# Supplementary material for: Comparison of US patient, rheumatologist, and dermatologist perceptions of psoriatic disease symptoms: results from the DISCONNECT study
Source: Springer Nature journal article supplement (doi:10.1186/s13075-018-1601-4), 2018-05-30
Supplement: MOESM1 [file 15806086]

## Psoriasis and Psoriatic Arthritis Survey

Thank you for agreeing to take this survey about psoriasis and psoriatic arthritis. First, we would like to ask you a few questions about your experience with psoriasis and psoriatic arthritis.

1. How long ago did a doctor tell you that you have psoriasis?
  - Less than 6 months
  - 6 months to less than 1 year
  - 1 year to less than 2 years
  - 2 years to less than 5 years
  - 5 years to less than 10 years
  - 10 years or more
  
2. How long ago did a doctor tell you that you have psoriatic arthritis?
  - Less than 6 months
  - 6 months to less than 1 year
  - 1 year to less than 2 years
  - 2 years to less than 5 years
  - 5 years to less than 10 years
  - 10 years or more

3. Where on your body have you had psoriasis patches in the past week?  
(Check all that apply.)

- Face
- Neck
- Scalp
- Genital area
- Hands
- Feet
- Fingernails
- Toenails
- Arms (includes elbows)
- Legs (includes hips and knees)
- Chest or back (includes stomach)
- Buttocks
- Other
- I have not had any psoriasis patches in the past week

The amount of body area affected by psoriasis varies from person to person. The area of your hand, both palm and fingers, is about 1% of your total body area.

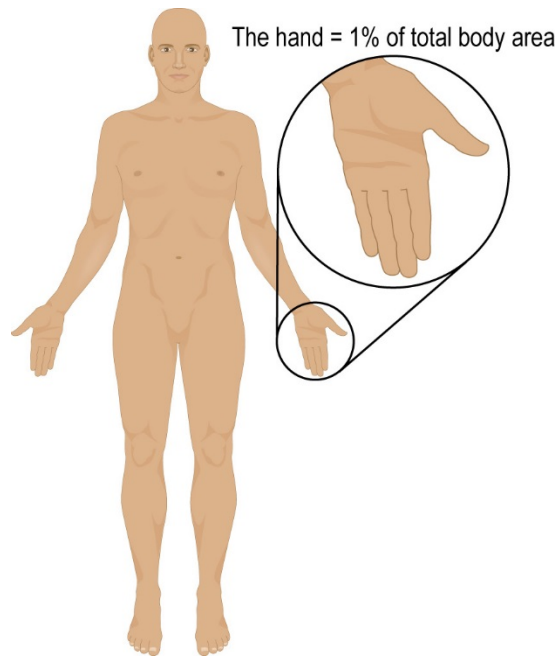

4. About how much of your body area has been covered with psoriasis patches in the past week?

- 2 hand areas or less
- 3 to 5 hand areas
- 6 to 9 hand areas
- 10 to 14 hand areas
- 15 to 19 hand areas
- More than 20 hand areas
- I have not had any psoriasis patches in the past week

5. In which of the following places on your body have you had pain, swelling, or stiffness in the past week because of your psoriatic arthritis?

*(Check all that apply.)*

- In your fingers
- In your toes
- In your feet
- In your ankles
- In your knees
- In your hips
- In your elbows
- In your neck
- In your upper back
- In your lower back
- In your shoulders
- In your buttocks
- None of the above

6. What treatments have you ever used to treat your psoriasis and psoriatic arthritis? (Check all that apply.)
- Creams, lotions, ointments, or foams (includes prescription and over-the-counter treatments)
  - Shampoos
  - Oral prescription medicines
  - Light therapy
  - Injectable medicines
  - Intravenous infusions at a doctor's office, infusion center, or hospital
  - Other
  - None of the above
7. [\[If at least one treatment \(other than "Other" or "None of the above"\) was selected in Q6\]](#) What treatments are you currently using to treat your psoriasis and psoriatic arthritis? (Check all that apply.)
- Creams, lotions, ointments, or foams (includes prescription and over-the-counter treatments) [\[include only if selected in Q6\]](#)
  - Shampoos [\[include only if selected in Q6\]](#)
  - Oral prescription medicines [\[include only if selected in Q6\]](#)
  - Light therapy [\[include only if selected in Q6\]](#)
  - Injectable medicines [\[include only if selected in Q6\]](#)
  - Intravenous infusions at a doctor's office, infusion center, or hospital [\[include only if selected in Q6\]](#)
  - Other
  - None of the above

8. [\[If creams, lotions, ointments, or foams selected in Q7\]](#) How long have you been using the creams, lotions, ointments, or foams that you are currently using?
- Less than 6 months
  - At least 6 months, but less than 1 year
  - At least 1 year, but less than 2 years
  - At least 2 years, but less than 5 years
  - 5 years or more
9. [\[If shampoos selected in Q7\]](#) How long have you been using the shampoos that you are currently using?
- Less than 6 months
  - At least 6 months, but less than 1 year
  - At least 1 year, but less than 2 years
  - At least 2 years, but less than 5 years
  - 5 years or more
10. [\[If oral prescription medicines selected in Q7\]](#) How long have you been using the oral prescription medicines that you are currently using?
- Less than 6 months
  - At least 6 months, but less than 1 year
  - At least 1 year, but less than 2 years
  - At least 2 years, but less than 5 years
  - 5 years or more

11. [If light therapy selected in Q7] How long have you been using light therapy?

- Less than 6 months
- At least 6 months, but less than 1 year
- At least 1 year, but less than 2 years
- At least 2 years, but less than 5 years
- 5 years or more

12. [If injectable medicines selected in Q7] How long have you been taking the injectable medicines that you are currently taking?

- Less than 6 months
- At least 6 months, but less than 1 year
- At least 1 year, but less than 2 years
- At least 2 years, but less than 5 years
- 5 years or more

13. [If intravenous infusions selected in Q7] How long have you been receiving the intravenous infusions that you are currently receiving?

- Less than 6 months
- At least 6 months, but less than 1 year
- At least 1 year, but less than 2 years
- At least 2 years, but less than 5 years
- 5 years or more

## **Psoriasis and Psoriatic Arthritis**

Psoriasis causes patches of scaly, red, or white skin called *plaques*. Psoriatic arthritis causes joint swelling and pain that can lead to permanent damage. Inflammation happens with both psoriasis and psoriatic arthritis because your immune system attacks your body instead of something outside of it. These two conditions are often related, but you may have skin problems and joint problems in different parts of your body.

Please go to the next page.



## **Symptoms of Psoriasis and Psoriatic Arthritis**

The next few pages of this survey will describe different symptoms of psoriasis and psoriatic arthritis, including potential impacts on your daily activities. These symptoms are presented in three groups: skin symptoms, joint symptoms, and the impact of these conditions on your daily activities. This information will help you answer questions later in the survey. You can refer back to this information as you take the survey.

Please go to the next page.

## Skin Symptoms

| Symptom                      | Description                                                                                         |
|------------------------------|-----------------------------------------------------------------------------------------------------|
| Itching skin                 | Physically irritated skin resulting in the urge to scratch                                          |
| Redness of skin              | Red or salmon-pink color of psoriasis-affected skin                                                 |
| Flaking skin                 | Skin shedding                                                                                       |
| Painful skin                 | Painful inflamed or broken skin                                                                     |
| Nail problems                | Discoloration or pitting of the fingernails or toenails or separation of the nail from the nail bed |
| Difficulty choosing clothing | Skin problems influencing the clothing you wear                                                     |
| Embarrassment                | Being embarrassed or self-conscious because of your skin                                            |

14. Please indicate which of the following skin symptoms you have ever experienced. (*Check all that apply.*)

- Itching skin
- Redness of skin
- Flaking skin
- Painful skin
- Nail problems
- Difficulty choosing clothing
- Embarrassment

15. [\[If at least one symptom was selected in Q14\]](#) Please indicate which of the following skin symptoms you have experienced in the past week.

*(Check all that apply.)*

- Itching skin [\[If selected in Q14\]](#)
- Redness of skin [\[If selected in Q14\]](#)
- Flaking skin [\[If selected in Q14\]](#)
- Painful skin [\[If selected in Q14\]](#)
- Nail problems [\[If selected in Q14\]](#)
- Difficulty choosing clothing [\[If selected in Q14\]](#)
- Embarrassment [\[If selected in Q14\]](#)
- I have not had any of these skin symptoms in the past week [\[Can only select this response if no other response to the question; if selected, skip to next section "Joint symptoms"\]](#)

16. [\[If at least one symptom was selected in Q15\]](#) Select the number that best describes how severe each of your skin symptoms has been in the past week:

Itching skin [\[If selected in Q15\]](#)

|      |   |   |   |   |   |   |   |   |   |   |    |         |
|------|---|---|---|---|---|---|---|---|---|---|----|---------|
| None | 0 | 1 | 2 | 3 | 4 | 5 | 6 | 7 | 8 | 9 | 10 | Extreme |
|------|---|---|---|---|---|---|---|---|---|---|----|---------|

Redness of skin [\[If selected in Q15\]](#)

|      |   |   |   |   |   |   |   |   |   |   |    |         |
|------|---|---|---|---|---|---|---|---|---|---|----|---------|
| None | 0 | 1 | 2 | 3 | 4 | 5 | 6 | 7 | 8 | 9 | 10 | Extreme |
|------|---|---|---|---|---|---|---|---|---|---|----|---------|

Flaking skin [\[If selected in Q15\]](#)

|      |   |   |   |   |   |   |   |   |   |   |    |         |
|------|---|---|---|---|---|---|---|---|---|---|----|---------|
| None | 0 | 1 | 2 | 3 | 4 | 5 | 6 | 7 | 8 | 9 | 10 | Extreme |
|------|---|---|---|---|---|---|---|---|---|---|----|---------|

Painful skin [\[If selected in Q15\]](#)

|      |   |   |   |   |   |   |   |   |   |   |    |         |
|------|---|---|---|---|---|---|---|---|---|---|----|---------|
| None | 0 | 1 | 2 | 3 | 4 | 5 | 6 | 7 | 8 | 9 | 10 | Extreme |
|------|---|---|---|---|---|---|---|---|---|---|----|---------|

Nail problems [\[If selected in Q15\]](#)

|      |   |   |   |   |   |   |   |   |   |   |    |         |
|------|---|---|---|---|---|---|---|---|---|---|----|---------|
| None | 0 | 1 | 2 | 3 | 4 | 5 | 6 | 7 | 8 | 9 | 10 | Extreme |
|------|---|---|---|---|---|---|---|---|---|---|----|---------|

Difficulty choosing clothing [\[If selected in Q15\]](#)

|               |   |   |   |   |   |   |   |   |   |   |    |                    |
|---------------|---|---|---|---|---|---|---|---|---|---|----|--------------------|
| No difficulty | 0 | 1 | 2 | 3 | 4 | 5 | 6 | 7 | 8 | 9 | 10 | Extreme difficulty |
|---------------|---|---|---|---|---|---|---|---|---|---|----|--------------------|

Embarrassment [\[If selected in Q15\]](#)

|               |   |   |   |   |   |   |   |   |   |   |    |                    |
|---------------|---|---|---|---|---|---|---|---|---|---|----|--------------------|
| No difficulty | 0 | 1 | 2 | 3 | 4 | 5 | 6 | 7 | 8 | 9 | 10 | Extreme difficulty |
|---------------|---|---|---|---|---|---|---|---|---|---|----|--------------------|

17. Select the number that best describes how much your skin symptoms have affected you overall in the past week.

Did not  
affect how  
I felt at all

|   |   |   |   |   |   |   |   |   |   |    |
|---|---|---|---|---|---|---|---|---|---|----|
| 0 | 1 | 2 | 3 | 4 | 5 | 6 | 7 | 8 | 9 | 10 |
|---|---|---|---|---|---|---|---|---|---|----|

Severely  
affected  
how I felt

## Joint Symptoms

| Symptom                             | Description                                                                  |
|-------------------------------------|------------------------------------------------------------------------------|
| Joint pain, soreness, or tenderness | Stiffness, pain, throbbing, swelling, and tenderness in one or more joints   |
| Swelling of fingers or toes         | Sausage-like swelling of one or more fingers or toes                         |
| Fatigue                             | Tiredness and lack of energy that doesn't go away with sleep                 |
| Morning stiffness                   | Stiffness after resting that makes it difficult to move your joints          |
| Eye problems                        | Eye swelling, redness in or around your eyes, eye pain, and/or blurry vision |
| Difficulty dressing                 | Difficulty tying shoelaces and buttoning your clothes                        |
| Difficulty walking                  | Difficulty walking at a normal speed                                         |

18. Please indicate which of the following joint symptoms you have ever experienced. (*Check all that apply.*)

- Joint pain, soreness, or tenderness
- Swelling of fingers or toes
- Fatigue
- Morning stiffness
- Eye problems
- Difficulty dressing
- Difficulty walking

19. [\[If at least one symptom was selected in Q18\]](#) Please indicate which of the following joint symptoms you have experienced in the past week. (*Check all that apply.*)

- Joint pain, soreness, or tenderness [\[If selected in Q18\]](#)
- Swelling of fingers or toes [\[If selected in Q18\]](#)
- Fatigue [\[If selected in Q18\]](#)
- Morning stiffness [\[If selected in Q18\]](#)
- Eye problems [\[If selected in Q18\]](#)
- Difficulty dressing [\[If selected in Q18\]](#)
- Difficulty walking [\[If selected in Q18\]](#)
- I have not had any of these joint symptoms in the past week [\[Can only select this response if no other response to the question; if selected, skip to next section "Impact of Psoriasis and Psoriatic Arthritis on Daily Activities"\]](#)

20. [\[If at least one symptom was selected in Q19\]](#) Select the number that best describes how severe each of your joint symptoms has been in the past week:

Joint pain, soreness, or tenderness [\[If selected in Q19\]](#)

|      |   |   |   |   |   |   |   |   |   |   |    |         |
|------|---|---|---|---|---|---|---|---|---|---|----|---------|
| None | 0 | 1 | 2 | 3 | 4 | 5 | 6 | 7 | 8 | 9 | 10 | Extreme |
|------|---|---|---|---|---|---|---|---|---|---|----|---------|

Swelling of fingers or toes [\[If selected in Q19\]](#)

|      |   |   |   |   |   |   |   |   |   |   |    |         |
|------|---|---|---|---|---|---|---|---|---|---|----|---------|
| None | 0 | 1 | 2 | 3 | 4 | 5 | 6 | 7 | 8 | 9 | 10 | Extreme |
|------|---|---|---|---|---|---|---|---|---|---|----|---------|

Fatigue [\[If selected in Q19\]](#)

|      |   |   |   |   |   |   |   |   |   |   |    |         |
|------|---|---|---|---|---|---|---|---|---|---|----|---------|
| None | 0 | 1 | 2 | 3 | 4 | 5 | 6 | 7 | 8 | 9 | 10 | Extreme |
|------|---|---|---|---|---|---|---|---|---|---|----|---------|

Morning stiffness [\[If selected in Q19\]](#)

|      |   |   |   |   |   |   |   |   |   |   |    |         |
|------|---|---|---|---|---|---|---|---|---|---|----|---------|
| None | 0 | 1 | 2 | 3 | 4 | 5 | 6 | 7 | 8 | 9 | 10 | Extreme |
|------|---|---|---|---|---|---|---|---|---|---|----|---------|

Eye problems [\[If selected in Q19\]](#)

|      |   |   |   |   |   |   |   |   |   |   |    |         |
|------|---|---|---|---|---|---|---|---|---|---|----|---------|
| None | 0 | 1 | 2 | 3 | 4 | 5 | 6 | 7 | 8 | 9 | 10 | Extreme |
|------|---|---|---|---|---|---|---|---|---|---|----|---------|

Difficulty dressing [\[If selected in Q19\]](#)

|               |   |   |   |   |   |   |   |   |   |   |    |                    |
|---------------|---|---|---|---|---|---|---|---|---|---|----|--------------------|
| No difficulty | 0 | 1 | 2 | 3 | 4 | 5 | 6 | 7 | 8 | 9 | 10 | Extreme difficulty |
|---------------|---|---|---|---|---|---|---|---|---|---|----|--------------------|

Difficulty walking [\[If selected in Q19\]](#)

|               |   |   |   |   |   |   |   |   |   |   |    |                    |
|---------------|---|---|---|---|---|---|---|---|---|---|----|--------------------|
| No difficulty | 0 | 1 | 2 | 3 | 4 | 5 | 6 | 7 | 8 | 9 | 10 | Extreme difficulty |
|---------------|---|---|---|---|---|---|---|---|---|---|----|--------------------|



21. Select the number that best describes how much your joint symptoms have affected you overall in the past week.

Did not  
affect how  
I felt at all

|   |   |   |   |   |   |   |   |   |   |    |
|---|---|---|---|---|---|---|---|---|---|----|
| 0 | 1 | 2 | 3 | 4 | 5 | 6 | 7 | 8 | 9 | 10 |
|---|---|---|---|---|---|---|---|---|---|----|

Severely  
affected  
how I felt

## Impact of Psoriasis and Psoriatic Arthritis on Daily Activities

| Impact on Daily Activities                                | Description                                                                                                                          |
|-----------------------------------------------------------|--------------------------------------------------------------------------------------------------------------------------------------|
| Difficulty with work or school activities                 | Difficulty doing your normal work or schoolwork because of your psoriasis or psoriatic arthritis                                     |
| Difficulty with social or leisure activities              | Difficulty doing your normal social or leisure activities because of your psoriasis or psoriatic arthritis                           |
| Difficulty going shopping or doing housework or yard work | Difficulty going shopping or looking after your home or yard because of your psoriasis or psoriatic arthritis                        |
| Difficulty sleeping                                       | Having poor sleep quality or sleep interruptions because of your psoriasis or psoriatic arthritis                                    |
| Discomfort while doing everyday tasks                     | Discomfort doing everyday tasks, such as eating, bathing, or going to the bathroom, because of your psoriasis or psoriatic arthritis |
| Problems with relationships                               | Problems with partner, close friends, or family because of your psoriasis or psoriatic arthritis                                     |

22. Please indicate which of the following impacts on daily activities that you have ever experienced. (Check all that apply.)

- Difficulty with work or school activities
- Difficulty with social or leisure activities
- Difficulty going shopping or doing housework or yard work
- Difficulty sleeping
- Discomfort while doing everyday tasks
- Problems with relationships
- I have never experienced any of these impacts on my daily activities [Can only select this response if no other response to the question; if selected, skip to next section “Burden of Symptoms of Psoriasis and Psoriatic Arthritis”]

23. [\[If at least one impact was selected in Q22\]](#) Please indicate which of the following impacts on daily activities you have experienced in the past week.

*(Check all that apply.)*

- Difficulty with work or school activities [\[If selected in Q22\]](#)
- Difficulty with social or leisure activities [\[If selected in Q22\]](#)
- Difficulty going shopping or doing housework or yard work [\[If selected in Q22\]](#)
- Difficulty sleeping [\[If selected in Q22\]](#)
- Discomfort while doing everyday tasks [\[If selected in Q22\]](#)
- Problems with relationships [\[If selected in Q22\]](#)
- I have not had difficulty with any daily activities in the past week [\[Can only select this response if no other response to the question; if selected, skip to next section "Burden of Symptoms of Psoriasis and Psoriatic Arthritis"\]](#)

24. [\[If at least one impact was selected in Q23\]](#) Select the number that best describes how severe each of the impacts on daily living has been in the past week:

Difficulty with work or school activities [\[If selected in Q23\]](#)

|               |   |   |   |   |   |   |   |   |   |   |    |                    |
|---------------|---|---|---|---|---|---|---|---|---|---|----|--------------------|
| No difficulty | 0 | 1 | 2 | 3 | 4 | 5 | 6 | 7 | 8 | 9 | 10 | Extreme difficulty |
|---------------|---|---|---|---|---|---|---|---|---|---|----|--------------------|

Difficulty with social or leisure activities [\[If selected in Q23\]](#)

|               |   |   |   |   |   |   |   |   |   |   |    |                    |
|---------------|---|---|---|---|---|---|---|---|---|---|----|--------------------|
| No difficulty | 0 | 1 | 2 | 3 | 4 | 5 | 6 | 7 | 8 | 9 | 10 | Extreme difficulty |
|---------------|---|---|---|---|---|---|---|---|---|---|----|--------------------|

Difficulty going shopping or doing housework or yard work [\[If selected in Q23\]](#)

|               |   |   |   |   |   |   |   |   |   |   |    |                    |
|---------------|---|---|---|---|---|---|---|---|---|---|----|--------------------|
| No difficulty | 0 | 1 | 2 | 3 | 4 | 5 | 6 | 7 | 8 | 9 | 10 | Extreme difficulty |
|---------------|---|---|---|---|---|---|---|---|---|---|----|--------------------|

Difficulty sleeping [\[If selected in Q23\]](#)

|               |   |   |   |   |   |   |   |   |   |   |    |                    |
|---------------|---|---|---|---|---|---|---|---|---|---|----|--------------------|
| No difficulty | 0 | 1 | 2 | 3 | 4 | 5 | 6 | 7 | 8 | 9 | 10 | Extreme difficulty |
|---------------|---|---|---|---|---|---|---|---|---|---|----|--------------------|

Discomfort while doing everyday tasks [\[If selected in Q23\]](#)

|               |   |   |   |   |   |   |   |   |   |   |    |                    |
|---------------|---|---|---|---|---|---|---|---|---|---|----|--------------------|
| No discomfort | 0 | 1 | 2 | 3 | 4 | 5 | 6 | 7 | 8 | 9 | 10 | Extreme discomfort |
|---------------|---|---|---|---|---|---|---|---|---|---|----|--------------------|

Problems with relationships [\[If selected in Q23\]](#)

|             |   |   |   |   |   |   |   |   |   |   |    |                  |
|-------------|---|---|---|---|---|---|---|---|---|---|----|------------------|
| No problems | 0 | 1 | 2 | 3 | 4 | 5 | 6 | 7 | 8 | 9 | 10 | Extreme problems |
|-------------|---|---|---|---|---|---|---|---|---|---|----|------------------|

## Burden of Symptoms of Psoriasis and Psoriatic Arthritis

We are interested in knowing how bothered you would be by each of the symptoms described earlier in this survey.

**Even if you are not currently experiencing these symptoms or have never experienced these symptoms in the past, we would like to know how bothered you would be if you experienced these symptoms.**

The table below shows 5 possible symptoms. Please tell us which one would bother you the most. In other words, which one would you want to avoid the most?

### BWS Question 1

| <b>I would be bothered by this the MOST (Check only ONE)</b> | <b>Symptom</b>                               |
|--------------------------------------------------------------|----------------------------------------------|
| <input type="checkbox"/>                                     | Problems with relationships                  |
| <input type="checkbox"/>                                     | Joint pain, soreness, or tenderness          |
| <input type="checkbox"/>                                     | Difficulty with social or leisure activities |
| <input type="checkbox"/>                                     | Redness of skin                              |
| <input type="checkbox"/>                                     | Difficulty sleeping                          |

25. In the previous question, you told us that [insert symptom chosen in previous question] was the most bothersome symptom.

That means that you think that [insert symptom chosen in previous question] is more bothersome than \_\_\_\_\_, \_\_\_\_\_, \_\_\_\_\_, and \_\_\_\_\_ [insert 4 symptoms not chosen in previous question].

Is that correct?

Yes

No

[If yes, go to next page.]

[If no, show previous BWS question with the following heading: “Please indicate which of these 5 symptoms would bother you the most by checking the box to the left of the symptom.”]

[Do not allow respondents to select the feature checked in the previous question.]

Now, please tell us which of these same 5 symptoms bothers you the least. In other words, which one would you choose if you had to experience one of these symptoms?

| <b>Symptom</b>                               | <b>I would be bothered by this the LEAST (Check only ONE)</b> |
|----------------------------------------------|---------------------------------------------------------------|
| Problems with relationships                  | <input type="checkbox"/>                                      |
| Joint pain, soreness, or tenderness          | <input type="checkbox"/>                                      |
| Difficulty with social or leisure activities | <input type="checkbox"/>                                      |
| Redness of skin                              | <input type="checkbox"/>                                      |
| Difficulty sleeping                          | <input type="checkbox"/>                                      |

26. In the previous question, you told us that [insert symptom chosen in previous question] was the least bothersome symptom.

That means that you think that [insert symptom chosen in previous question] is less bothersome than \_\_\_\_\_, \_\_\_\_\_, \_\_\_\_\_, and \_\_\_\_\_ [insert 4 symptoms not chosen in previous question].

Is that correct?

Yes

No

[If yes, go to next page.]

[If no, show previous BWS question with the following heading: “Please indicate which of these 5 symptoms would bother you the least by checking the box to the right of the symptom.”]



For each of the next 15 questions, we will show you a set of 5 symptoms.

For each set of symptoms, please select the symptom that would bother you the most by checking the box to the left of the symptom.

Then, please select the symptom that would bother you the least by checking the box to the right of that symptom.

Please choose only 1 symptom as the one that would bother you the most and 1 symptom that would bother you the least in each question.

**BWS Question 2**

Please indicate which one of the 5 symptoms listed below would bother you the most and which one would bother you the least if you experienced these symptoms.

| <b>I would be bothered by this the MOST (Check only ONE)</b> | <b>Symptom</b>                                            | <b>I would be bothered by this the LEAST (Check only ONE)</b> |
|--------------------------------------------------------------|-----------------------------------------------------------|---------------------------------------------------------------|
| <input type="checkbox"/>                                     | Redness of skin                                           | <input type="checkbox"/>                                      |
| <input type="checkbox"/>                                     | Swelling of fingers or toes                               | <input type="checkbox"/>                                      |
| <input type="checkbox"/>                                     | Itching skin                                              | <input type="checkbox"/>                                      |
| <input type="checkbox"/>                                     | Painful skin                                              | <input type="checkbox"/>                                      |
| <input type="checkbox"/>                                     | Difficulty going shopping or doing housework or yard work | <input type="checkbox"/>                                      |

**BWS Question 3**

Please indicate which one of the 5 symptoms listed below would bother you the most and which one would bother you the least if you experienced these symptoms.

| <b>I would be bothered by this the MOST (Check only ONE)</b> | <b>Symptom</b>                            | <b>I would be bothered by this the LEAST (Check only ONE)</b> |
|--------------------------------------------------------------|-------------------------------------------|---------------------------------------------------------------|
| <input type="checkbox"/>                                     | Joint pain, soreness, or tenderness       | <input type="checkbox"/>                                      |
| <input type="checkbox"/>                                     | Morning stiffness                         | <input type="checkbox"/>                                      |
| <input type="checkbox"/>                                     | Difficulty with work or school activities | <input type="checkbox"/>                                      |
| <input type="checkbox"/>                                     | Flaking skin                              | <input type="checkbox"/>                                      |
| <input type="checkbox"/>                                     | Discomfort while doing everyday tasks     | <input type="checkbox"/>                                      |

**BWS Question 4**

Please indicate which one of the 5 symptoms listed below would bother you the most and which one would bother you the least if you experienced these symptoms.

| <b>I would be bothered by this the MOST (Check only ONE)</b> | <b>Symptom</b>                                            | <b>I would be bothered by this the LEAST (Check only ONE)</b> |
|--------------------------------------------------------------|-----------------------------------------------------------|---------------------------------------------------------------|
| <input type="checkbox"/>                                     | Discomfort while doing everyday tasks                     | <input type="checkbox"/>                                      |
| <input type="checkbox"/>                                     | Difficulty going shopping or doing housework or yard work | <input type="checkbox"/>                                      |
| <input type="checkbox"/>                                     | Difficulty dressing                                       | <input type="checkbox"/>                                      |
| <input type="checkbox"/>                                     | Difficulty choosing clothing                              | <input type="checkbox"/>                                      |
| <input type="checkbox"/>                                     | Difficulty walking                                        | <input type="checkbox"/>                                      |

**BWS Question 5**

Please indicate which one of the 5 symptoms listed below would bother you the most and which one would bother you the least if you experienced these symptoms.

| <b>I would be bothered by this the MOST (Check only ONE)</b> | <b>Symptom</b>    | <b>I would be bothered by this the LEAST (Check only ONE)</b> |
|--------------------------------------------------------------|-------------------|---------------------------------------------------------------|
| <input type="checkbox"/>                                     | Flaking skin      | <input type="checkbox"/>                                      |
| <input type="checkbox"/>                                     | Itching skin      | <input type="checkbox"/>                                      |
| <input type="checkbox"/>                                     | Morning stiffness | <input type="checkbox"/>                                      |
| <input type="checkbox"/>                                     | Embarrassment     | <input type="checkbox"/>                                      |
| <input type="checkbox"/>                                     | Nail problems     | <input type="checkbox"/>                                      |

**BWS Question 6**

Please indicate which one of the 5 symptoms listed below would bother you the most and which one would bother you the least if you experienced these symptoms.

| <b>I would be bothered by this the MOST (Check only ONE)</b> | <b>Symptom</b>               | <b>I would be bothered by this the LEAST (Check only ONE)</b> |
|--------------------------------------------------------------|------------------------------|---------------------------------------------------------------|
| <input type="checkbox"/>                                     | Difficulty choosing clothing | <input type="checkbox"/>                                      |
| <input type="checkbox"/>                                     | Nail problems                | <input type="checkbox"/>                                      |
| <input type="checkbox"/>                                     | Problems with relationships  | <input type="checkbox"/>                                      |
| <input type="checkbox"/>                                     | Eye problems                 | <input type="checkbox"/>                                      |
| <input type="checkbox"/>                                     | Painful skin                 | <input type="checkbox"/>                                      |

**BWS Question 7**

Please indicate which one of the 5 symptoms listed below would bother you the most and which one would bother you the least if you experienced these symptoms.

| <b>I would be bothered by this the MOST (Check only ONE)</b> | <b>Symptom</b>                               | <b>I would be bothered by this the LEAST (Check only ONE)</b> |
|--------------------------------------------------------------|----------------------------------------------|---------------------------------------------------------------|
| <input type="checkbox"/>                                     | Difficulty dressing                          | <input type="checkbox"/>                                      |
| <input type="checkbox"/>                                     | Difficulty with social or leisure activities | <input type="checkbox"/>                                      |
| <input type="checkbox"/>                                     | Difficulty walking                           | <input type="checkbox"/>                                      |
| <input type="checkbox"/>                                     | Fatigue                                      | <input type="checkbox"/>                                      |
| <input type="checkbox"/>                                     | Embarrassment                                | <input type="checkbox"/>                                      |

**BWS Question 8**

Please indicate which one of the 5 symptoms listed below would bother you the most and which one would bother you the least if you experienced these symptoms.

| <b>I would be bothered by this the MOST (Check only ONE)</b> | <b>Symptom</b>                            | <b>I would be bothered by this the LEAST (Check only ONE)</b> |
|--------------------------------------------------------------|-------------------------------------------|---------------------------------------------------------------|
| <input type="checkbox"/>                                     | Difficulty sleeping                       | <input type="checkbox"/>                                      |
| <input type="checkbox"/>                                     | Fatigue                                   | <input type="checkbox"/>                                      |
| <input type="checkbox"/>                                     | Swelling of fingers or toes               | <input type="checkbox"/>                                      |
| <input type="checkbox"/>                                     | Difficulty with work or school activities | <input type="checkbox"/>                                      |
| <input type="checkbox"/>                                     | Eye problems                              | <input type="checkbox"/>                                      |



**BWS Question 9**

Please indicate which one of the 5 symptoms listed below would bother you the most and which one would bother you the least if you experienced these symptoms.

| <b>I would be bothered by this the MOST (Check only ONE)</b> | <b>Symptom</b>                      | <b>I would be bothered by this the LEAST (Check only ONE)</b> |
|--------------------------------------------------------------|-------------------------------------|---------------------------------------------------------------|
| <input type="checkbox"/>                                     | Painful skin                        | <input type="checkbox"/>                                      |
| <input type="checkbox"/>                                     | Difficulty dressing                 | <input type="checkbox"/>                                      |
| <input type="checkbox"/>                                     | Flaking skin                        | <input type="checkbox"/>                                      |
| <input type="checkbox"/>                                     | Joint pain, soreness, or tenderness | <input type="checkbox"/>                                      |
| <input type="checkbox"/>                                     | Fatigue                             | <input type="checkbox"/>                                      |

**BWS Question 10**

Please indicate which one of the 5 symptoms listed below would bother you the most and which one would bother you the least if you experienced these symptoms.

| <b>I would be bothered by this the MOST (Check only ONE)</b> | <b>Symptom</b>              | <b>I would be bothered by this the LEAST (Check only ONE)</b> |
|--------------------------------------------------------------|-----------------------------|---------------------------------------------------------------|
| <input type="checkbox"/>                                     | Eye problems                | <input type="checkbox"/>                                      |
| <input type="checkbox"/>                                     | Flaking skin                | <input type="checkbox"/>                                      |
| <input type="checkbox"/>                                     | Difficulty walking          | <input type="checkbox"/>                                      |
| <input type="checkbox"/>                                     | Problems with relationships | <input type="checkbox"/>                                      |
| <input type="checkbox"/>                                     | Itching skin                | <input type="checkbox"/>                                      |

**BWS Question 11**

Please indicate which one of the 5 symptoms listed below would bother you the most and which one would bother you the least if you experienced these symptoms.

| <b>I would be bothered by this the MOST (Check only ONE)</b> | <b>Symptom</b>                                            | <b>I would be bothered by this the LEAST (Check only ONE)</b> |
|--------------------------------------------------------------|-----------------------------------------------------------|---------------------------------------------------------------|
| <input type="checkbox"/>                                     | Difficulty going shopping or doing housework or yard work | <input type="checkbox"/>                                      |
| <input type="checkbox"/>                                     | Difficulty with work or school activities                 | <input type="checkbox"/>                                      |
| <input type="checkbox"/>                                     | Painful skin                                              | <input type="checkbox"/>                                      |
| <input type="checkbox"/>                                     | Difficulty with social or leisure activities              | <input type="checkbox"/>                                      |
| <input type="checkbox"/>                                     | Nail problems                                             | <input type="checkbox"/>                                      |

**BWS Question 12**

Please indicate which one of the 5 symptoms listed below would bother you the most and which one would bother you the least if you experienced these symptoms.

| <b>I would be bothered by this the MOST (Check only ONE)</b> | <b>Symptom</b>                        | <b>I would be bothered by this the LEAST (Check only ONE)</b> |
|--------------------------------------------------------------|---------------------------------------|---------------------------------------------------------------|
| <input type="checkbox"/>                                     | Swelling of fingers or toes           | <input type="checkbox"/>                                      |
| <input type="checkbox"/>                                     | Discomfort while doing everyday tasks | <input type="checkbox"/>                                      |
| <input type="checkbox"/>                                     | Embarrassment                         | <input type="checkbox"/>                                      |
| <input type="checkbox"/>                                     | Problems with relationships           | <input type="checkbox"/>                                      |
| <input type="checkbox"/>                                     | Joint pain, soreness, or tenderness   | <input type="checkbox"/>                                      |

**BWS Question 13**

Please indicate which one of the 5 symptoms listed below would bother you the most and which one would bother you the least if you experienced these symptoms.

| <b>I would be bothered by this the MOST (Check only ONE)</b> | <b>Symptom</b>                               | <b>I would be bothered by this the LEAST (Check only ONE)</b> |
|--------------------------------------------------------------|----------------------------------------------|---------------------------------------------------------------|
| <input type="checkbox"/>                                     | Morning stiffness                            | <input type="checkbox"/>                                      |
| <input type="checkbox"/>                                     | Redness of skin                              | <input type="checkbox"/>                                      |
| <input type="checkbox"/>                                     | Eye problems                                 | <input type="checkbox"/>                                      |
| <input type="checkbox"/>                                     | Swelling of fingers or toes                  | <input type="checkbox"/>                                      |
| <input type="checkbox"/>                                     | Difficulty with social or leisure activities | <input type="checkbox"/>                                      |

**BWS Question 14**

Please indicate which one of the 5 symptoms listed below would bother you the most and which one would bother you the least if you experienced these symptoms.

| <b>I would be bothered by this the MOST (Check only ONE)</b> | <b>Symptom</b>                            | <b>I would be bothered by this the LEAST (Check only ONE)</b> |
|--------------------------------------------------------------|-------------------------------------------|---------------------------------------------------------------|
| <input type="checkbox"/>                                     | Difficulty walking                        | <input type="checkbox"/>                                      |
| <input type="checkbox"/>                                     | Embarrassment                             | <input type="checkbox"/>                                      |
| <input type="checkbox"/>                                     | Difficulty choosing clothing              | <input type="checkbox"/>                                      |
| <input type="checkbox"/>                                     | Redness of skin                           | <input type="checkbox"/>                                      |
| <input type="checkbox"/>                                     | Difficulty with work or school activities | <input type="checkbox"/>                                      |

**BWS Question 15**

Please indicate which one of the 5 symptoms listed below would bother you the most and which one would bother you the least if you experienced these symptoms.

| <b>I would be bothered by this the MOST (Check only ONE)</b> | <b>Symptom</b>                                            | <b>I would be bothered by this the LEAST (Check only ONE)</b> |
|--------------------------------------------------------------|-----------------------------------------------------------|---------------------------------------------------------------|
| <input type="checkbox"/>                                     | Fatigue                                                   | <input type="checkbox"/>                                      |
| <input type="checkbox"/>                                     | Difficulty choosing clothing                              | <input type="checkbox"/>                                      |
| <input type="checkbox"/>                                     | Difficulty going shopping or doing housework or yard work | <input type="checkbox"/>                                      |
| <input type="checkbox"/>                                     | Morning stiffness                                         | <input type="checkbox"/>                                      |
| <input type="checkbox"/>                                     | Difficulty sleeping                                       | <input type="checkbox"/>                                      |

**BWS Question 16**

Please indicate which one of the 5 symptoms listed below would bother you the most and which one would bother you the least if you experienced these symptoms.

| <b>I would be bothered by this the MOST (Check only ONE)</b> | <b>Symptom</b>                        | <b>I would be bothered by this the LEAST (Check only ONE)</b> |
|--------------------------------------------------------------|---------------------------------------|---------------------------------------------------------------|
| <input type="checkbox"/>                                     | Nail problems                         | <input type="checkbox"/>                                      |
| <input type="checkbox"/>                                     | Difficulty sleeping                   | <input type="checkbox"/>                                      |
| <input type="checkbox"/>                                     | Discomfort while doing everyday tasks | <input type="checkbox"/>                                      |
| <input type="checkbox"/>                                     | Difficulty dressing                   | <input type="checkbox"/>                                      |
| <input type="checkbox"/>                                     | Itching skin                          | <input type="checkbox"/>                                      |



## Other Questions About You

27. In what year were you born? \_\_\_\_\_
28. What is your gender?
- Female
  - Male
  - Prefer not to answer
29. How would you describe your race or ethnicity? (*Check all that apply.*)
- White or Caucasian
  - Black or African American
  - Asian
  - Hispanic or Latino
  - Native Hawaiian or other Pacific Islander
  - American Indian or Alaska Native
  - Other
  - Prefer not to answer
30. What is your marital status?
- Single/never married
  - Married/living as married/civil partnership
  - Divorced or separated
  - Widowed/surviving partner
  - Other
  - Prefer not to answer

31. What is the highest level of education you have completed?
- Less than high school
  - Some high school
  - High school or equivalent (e.g., GED)
  - Some college but no degree
  - Technical school
  - Associate's degree (2-year college degree)
  - 4-year college degree (e.g., BA, BS)
  - Some graduate school but no degree
  - Graduate or professional degree (e.g., MBA, MS, MD, PhD)
32. Which of the following best describes your employment status?
- Employed full time
  - Employed part time
  - Self-employed
  - Homemaker
  - Student
  - Retired
  - Disabled/unable to work
  - On medical leave of absence from work
  - Unemployed but looking for work
  - Unemployed and not looking for work

33. What type of health insurance do you have? (*Check all that apply.*)

- I do not have health insurance
- Private insurance that I pay for myself
- Private insurance that my or my spouse's employer pays all or part of
- Medicaid
- Medicare
- Veterans Health insurance
- Other
- Don't know/not sure

34. What was your total household income before tax and other deductions in 2015?

- Less than \$20,000
- \$20,000 to \$29,999
- \$30,000 to \$39,999
- \$40,000 to \$49,999
- \$50,000 to \$59,999
- \$60,000 to \$69,999
- \$70,000 to \$79,999
- \$80,000 to \$89,999
- \$90,000 to \$99,999
- \$100,000 to \$149,999
- \$150,000 to \$199,999
- \$200,000 or more
- Don't know/not sure
- Prefer not to answer
