# Supplementary material for: Comparison of US patient, rheumatologist, and dermatologist perceptions of psoriatic disease symptoms: results from the DISCONNECT study
Source: Springer Nature journal article supplement (doi:10.1186/s13075-018-1601-4), 2018-05-30
Supplement: MOESM2 [file 15806086]

## Psoriasis and Psoriatic Arthritis Survey

Thank you for agreeing to take this survey about psoriasis and psoriatic arthritis. In this survey, we will ask for your professional opinion regarding symptoms and outcomes of plaque psoriasis and psoriatic arthritis.

1. How many years have you been in practice since completing your medical training?

- Less than 1 year
- 1-3 years
- 4-6 years
- 7-9 years
- 10-15 years
- 16-20 years
- 21-25 years
- More than 25 years

2. Which of the following describes your practice? (*Check all that apply.*)

- Office-based private practice
- Hospital-based private practice
- Academic hospital-based practice
- Other

4. On average, how many patients with plaque psoriasis do you treat each month?

- 5 patients or fewer
- 6-10 patients
- 11-20 patients

- 21-30 patients
- 31-40 patients
- 41-50 patients
- More than 50 patients

5. On average, how many patients with psoriatic arthritis do you treat each month?

- 5 patients or fewer
- 6-10 patients
- 11-20 patients
- 21-30 patients
- 31-40 patients
- 41-50 patients
- More than 50 patients

6. For what percentage of your patients do you prescribe biologic agents to treat psoriasis or psoriatic arthritis?

- I do not prescribe biologic agents
- More than 0%, but less than 25%
- 26%-50%
- 51%-75%
- 76%-100%

[if Q6 ≠ “I do not prescribe biologic agents”]

7. How long have you been prescribing biologic agents to treat patients with psoriasis or psoriatic arthritis?

- Less than 1 year
- 1-2 years
- 3-5 years
- More than 5 years

## **Symptoms of Psoriasis and Psoriatic Arthritis**

The next few pages of this survey will describe different symptoms of psoriasis and psoriatic arthritis, including the potential impact of psoriasis and psoriatic arthritis on patients' daily activities. These symptoms are presented in three groups: symptoms of psoriasis, symptoms of psoriatic arthritis, and the impact of psoriasis and psoriatic arthritis on daily activities.

## Symptoms of Psoriasis

| Symptom                      | Description                                                                                         |
|------------------------------|-----------------------------------------------------------------------------------------------------|
| Itching skin                 | Physically irritated skin resulting in the urge to scratch                                          |
| Redness of skin              | Red or salmon-pink color of psoriasis-affected skin                                                 |
| Flaking skin                 | Skin shedding                                                                                       |
| Painful skin                 | Painful inflamed or broken skin                                                                     |
| Nail problems                | Discoloration or pitting of the fingernails or toenails or separation of the nail from the nail bed |
| Difficulty choosing clothing | Skin problems influencing the clothing a patient wears                                              |
| Embarrassment                | Patient being embarrassed or self-conscious because of skin                                         |

8. Please indicate which of the following symptoms of psoriasis your patients with psoriasis or psoriatic arthritis report most often. (*Please check only one.*)

- Itching skin
- Redness of skin
- Flaking skin
- Painful skin
- Nail problems
- Difficulty choosing clothing
- Embarrassment

9. Please indicate which of the following symptoms of psoriasis your patients with psoriasis or psoriatic arthritis report least often. (*Please check only one.*)

- Itching skin [If not selected in Q7]
- Redness of skin [If not selected in Q7]
- Flaking skin [If not selected in Q7]
- Painful skin [If not selected in Q7]
- Nail problems [If not selected in Q7]
- Difficulty choosing clothing [If not selected in Q7]
- Embarrassment [If not selected in Q7]

## Symptoms of Psoriatic Arthritis

| Symptom                             | Description                                                               |
|-------------------------------------|---------------------------------------------------------------------------|
| Joint pain, soreness, or tenderness | Stiffness, pain, throbbing, swelling, or tenderness in one or more joints |
| Swelling of fingers or toes         | Sausage-like swelling in one or more fingers or toes                      |
| Fatigue                             | Tiredness and lack of energy that doesn't go away with sleep              |
| Morning stiffness                   | Stiffness after resting that makes it difficult to move joints            |
| Eye problems                        | Eye swelling, redness in or around eyes, eye pain, and/or blurry vision   |
| Difficulty dressing                 | Difficulty tying shoelaces and buttoning clothes                          |
| Difficulty walking                  | Difficulty walking at a normal speed                                      |

10. Please indicate which of the following symptoms of psoriatic arthritis your patients with psoriasis or psoriatic arthritis report most often.

*(Please check only one.)*

- Joint pain, soreness, or tenderness
- Swelling of fingers or toes
- Fatigue
- Morning stiffness
- Eye problems
- Difficulty dressing
- Difficulty walking

11. Please indicate which of the following symptoms of psoriatic arthritis your patients with psoriasis and psoriatic arthritis report least often.

*(Please check only one.)*

- Joint pain, soreness, or tenderness [If not selected in Q9]
- Swelling of fingers or toes [If not selected in Q9]
- Fatigue [If not selected in Q9]
- Morning stiffness [If not selected in Q9]
- Eye problems [If not selected in Q9]
- Difficulty dressing [If not selected in Q9]
- Difficulty walking [If not selected in Q9]



## Impact of Psoriasis and Psoriatic Arthritis on Daily Activities

| Impact on Daily Activities                                | Description                                                                                             |
|-----------------------------------------------------------|---------------------------------------------------------------------------------------------------------|
| Difficulty with work or school activities                 | Difficulty doing normal work or schoolwork because of psoriasis or psoriatic arthritis                  |
| Difficulty with social or leisure activities              | Difficulty doing normal social or leisure activities because of psoriasis or psoriatic arthritis        |
| Difficulty going shopping or doing housework or yard work | Difficulty going shopping or looking after the home or yard because of psoriasis or psoriatic arthritis |
| Difficulty sleeping                                       | Having poor sleep quality or sleep interruptions because of psoriasis or psoriatic arthritis            |
| Discomfort while doing everyday tasks                     | Discomfort doing everyday tasks because of psoriasis or psoriatic arthritis                             |
| Problems with relationships                               | Problems with partner, close friends, or family because of psoriasis or psoriatic arthritis             |

12. Please indicate which of the following impacts on daily activities your patients with psoriasis or psoriatic arthritis report most often. (*Please check only one.*)

- Difficulty with work or school activities
- Difficulty with social or leisure activities
- Difficulty going shopping or doing housework or yard work
- Difficulty sleeping
- Discomfort while doing everyday tasks
- Problems with relationships

13. Please indicate which of the following impacts on daily activities your patients with psoriasis or psoriatic arthritis report least often. (*Please check only one.*)

- Difficulty with work or school activities [If not selected in Q11]
- Difficulty with social or leisure activities [If not selected in Q11]
- Difficulty going shopping or doing housework [If not selected in Q11]
- Difficulty sleeping [If not selected in Q11]
- Discomfort while doing everyday tasks [If not selected in Q11]
- Problems with relationships [If not selected in Q11]

## **Burden of Symptoms of Psoriasis and Psoriatic Arthritis**

In the previous questions, we asked you how often your patients indicate that they are affected by different symptoms and impacts on daily activities of psoriasis and psoriatic arthritis.

For the remainder of this survey, we will ask you to think about how burdensome these symptoms and impacts on daily activities are to patients with psoriasis or psoriatic arthritis.

**THIS PAGE IS FOR PROGRAMMING PURPOSES ONLY**

The following variables will be referenced in the survey.

| Variable                 | <i>gender</i>                      | <i>severity_1</i>                                               | <i>severity_2</i>                                               | <i>bsa_1</i>                              | <i>bsa_2</i>                              | <i>joints_1</i>                          | <i>joints_2</i>                          |
|--------------------------|------------------------------------|-----------------------------------------------------------------|-----------------------------------------------------------------|-------------------------------------------|-------------------------------------------|------------------------------------------|------------------------------------------|
| <b>Assignment Method</b> | randomly assigned                  | randomly assigned                                               | randomly assigned but cannot equal severity_1                   | determined by severity_1                  | determined by severity_2                  | determined by severity_1                 | determined by severity_2                 |
| <b>Variable values</b>   | <i>female</i><br>or<br><i>male</i> | <i>mild,</i><br><br><i>moderate,</i><br><br>or<br><i>severe</i> | <i>mild,</i><br><br><i>moderate,</i><br><br>or<br><i>severe</i> | if severity_1= mild:<br><br><b>2%</b>     | if severity_2= mild:<br><br><b>2%</b>     | if severity_1= mild:<br><br><b>4</b>     | if severity_2= mild:<br><br><b>4</b>     |
|                          |                                    |                                                                 |                                                                 | if severity_1= moderate:<br><br><b>7%</b> | if severity_2= moderate:<br><br><b>7%</b> | if severity_1= moderate:<br><br><b>8</b> | if severity_2= moderate:<br><br><b>8</b> |
|                          |                                    |                                                                 |                                                                 | if severity_1= severe:<br><br><b>15%</b>  | if severity_2= severe:<br><br><b>15%</b>  | if severity_1= severe:<br><br><b>11</b>  | if severity_2= severe:<br><br><b>11</b>  |

We are interested in knowing how burdensome you think each of the symptoms and impacts on daily activities described earlier is to patients with psoriasis or psoriatic arthritis.

In the following questions, we will ask you to think about 8 hypothetical patients.

- Each of these patients is [gender].
- Each of these patients has plaques of [severity\_1] severity covering [bsa\_1] body surface area (BSA).
- Each of these patients has [joints\_1] painful, swollen, or tender joints.

Suppose that a [gender] patient has [severity\_1] plaques covering [bsa\_1] BSA and [joints\_1] affected joints and reports [<he/she>] is experiencing the 5 symptoms or impacts on daily activities listed below.

In your opinion, please tell us which one is most bothersome for the patient. In other words, which symptom or impact do you think the patient will want to avoid the most?

**[Questions for Patient 1 – 8 are the same as those for Patient 9 – 16. Each respondent will be randomly assigned to one of two blocks of eight questions. See spreadsheet for the symptoms that populate the questions.]**

**Patient 1**

| <b>MOST<br/>bothersome<br/>(Check only<br/>ONE)</b> | <b>Symptom</b> |
|-----------------------------------------------------|----------------|
| <input type="checkbox"/>                            |                |
| <input type="checkbox"/>                            |                |
| <input type="checkbox"/>                            |                |
| <input type="checkbox"/>                            |                |
| <input type="checkbox"/>                            |                |

[Do not allow respondents to select the feature checked in the previous question]

Now, please tell us which of these same 5 symptoms or impacts you think bothers this patient the least. In other words, which symptom or impact do you think the patient will choose if she has to experience one of these symptoms?

| Symptom | LEAST bothersome (Check only ONE) |
|---------|-----------------------------------|
|         | <input type="checkbox"/>          |
|         | <input type="checkbox"/>          |
|         | <input type="checkbox"/>          |
|         | <input type="checkbox"/>          |
|         | <input type="checkbox"/>          |

In the next 7 questions, we will show you different sets of 5 symptoms or impacts. For each set of symptoms or impacts, suppose a patient reports [[he/she](#)] is experiencing these 5 symptoms or impacts.

Please select the symptom or impact you think is most bothersome to the patient by checking the box to the left of the symptom or impact.

Then, please select the symptom or impact that is least bothersome to the patient by checking the box to the right of that symptom or impact.

Remember:

- Each of these patients is [[gender](#)].
- Each of these patients has plaques of [[severity\\_1](#)] severity covering [[bsa\\_1](#)] body surface area (BSA).
- Each of these patients has [[joints\\_1](#)] painful, swollen, or tender joints.

In each question, please choose only 1 symptom or impact as the most bothersome and 1 symptom or impact as the least bothersome.



**Patient 2**

Suppose this patient ([gender] with [severity\_1] plaques, [bsa\_1] BSA, and [joints\_1] affected joints) tells you [<he/she>] is experiencing the 5 symptoms in the list below. In your opinion, which of these symptoms is the most bothersome and least bothersome to this patient?

| <b>MOST<br/>bothersome<br/>(Check only<br/>ONE)</b> | <b>Symptom</b> | <b>LEAST<br/>bothersome<br/>(Check only<br/>ONE)</b> |
|-----------------------------------------------------|----------------|------------------------------------------------------|
| <input type="checkbox"/>                            |                | <input type="checkbox"/>                             |
| <input type="checkbox"/>                            |                | <input type="checkbox"/>                             |
| <input type="checkbox"/>                            |                | <input type="checkbox"/>                             |
| <input type="checkbox"/>                            |                | <input type="checkbox"/>                             |
| <input type="checkbox"/>                            |                | <input type="checkbox"/>                             |

**Patient 3**

Suppose this patient ([gender] with [severity\_1] plaques, [bsa\_1] BSA, and [joints\_1] affected joints) tells you [<he/she>] is experiencing the 5 symptoms in the list below. In your opinion, which of these symptoms is the most bothersome and least bothersome to this patient?

| <b>MOST<br/>bothersome<br/>(Check only<br/>ONE)</b> | <b>Symptom</b> | <b>LEAST<br/>bothersome<br/>(Check only<br/>ONE)</b> |
|-----------------------------------------------------|----------------|------------------------------------------------------|
| <input type="checkbox"/>                            |                | <input type="checkbox"/>                             |
| <input type="checkbox"/>                            |                | <input type="checkbox"/>                             |
| <input type="checkbox"/>                            |                | <input type="checkbox"/>                             |
| <input type="checkbox"/>                            |                | <input type="checkbox"/>                             |
| <input type="checkbox"/>                            |                | <input type="checkbox"/>                             |

**Patient 4**

Suppose this patient ([gender] with [severity\_1] plaques, [bsa\_1] BSA, and [joints\_1] affected joints) tells you [<he/she>] is experiencing the 5 symptoms in the list below. In your opinion, which of these symptoms is the most bothersome and least bothersome to this patient?

| <b>MOST<br/>bothersome<br/>(Check only<br/>ONE)</b> | <b>Symptom</b> | <b>LEAST<br/>bothersome<br/>(Check only<br/>ONE)</b> |
|-----------------------------------------------------|----------------|------------------------------------------------------|
| <input type="checkbox"/>                            |                | <input type="checkbox"/>                             |
| <input type="checkbox"/>                            |                | <input type="checkbox"/>                             |
| <input type="checkbox"/>                            |                | <input type="checkbox"/>                             |
| <input type="checkbox"/>                            |                | <input type="checkbox"/>                             |
| <input type="checkbox"/>                            |                | <input type="checkbox"/>                             |

**Patient 5**

Suppose this patient ([gender] with [severity\_1] plaques, [bsa\_1] BSA, and [joints\_1] affected joints) tells you [<he/she>] is experiencing the 5 symptoms in the list below. In your opinion, which of these symptoms is the most bothersome and least bothersome to this patient?

| <b>MOST<br/>bothersome<br/>(Check only<br/>ONE)</b> | <b>Symptom</b> | <b>LEAST<br/>bothersome<br/>(Check only<br/>ONE)</b> |
|-----------------------------------------------------|----------------|------------------------------------------------------|
| <input type="checkbox"/>                            |                | <input type="checkbox"/>                             |
| <input type="checkbox"/>                            |                | <input type="checkbox"/>                             |
| <input type="checkbox"/>                            |                | <input type="checkbox"/>                             |
| <input type="checkbox"/>                            |                | <input type="checkbox"/>                             |
| <input type="checkbox"/>                            |                | <input type="checkbox"/>                             |

**Patient 6**

Suppose this patient ([gender] with [severity\_1] plaques, [bsa\_1] BSA, and [joints\_1] affected joints) tells you [<he/she>] is experiencing the 5 symptoms in the list below. In your opinion, which of these symptoms is the most bothersome and least bothersome to this patient?

| <b>MOST<br/>bothersome<br/>(Check only<br/>ONE)</b> | <b>Symptom</b> | <b>LEAST<br/>bothersome<br/>(Check only<br/>ONE)</b> |
|-----------------------------------------------------|----------------|------------------------------------------------------|
| <input type="checkbox"/>                            |                | <input type="checkbox"/>                             |
| <input type="checkbox"/>                            |                | <input type="checkbox"/>                             |
| <input type="checkbox"/>                            |                | <input type="checkbox"/>                             |
| <input type="checkbox"/>                            |                | <input type="checkbox"/>                             |
| <input type="checkbox"/>                            |                | <input type="checkbox"/>                             |

**Patient 7**

Suppose this patient ([gender] with [severity\_1] plaques, [bsa\_1] BSA, and [joints\_1] affected joints) tells you [<he/she>] is experiencing the 5 symptoms in the list below. In your opinion, which of these symptoms is the most bothersome and least bothersome to this patient?

| <b>MOST<br/>bothersome<br/>(Check only<br/>ONE)</b> | <b>Symptom</b> | <b>LEAST<br/>bothersome<br/>(Check only<br/>ONE)</b> |
|-----------------------------------------------------|----------------|------------------------------------------------------|
| <input type="checkbox"/>                            |                | <input type="checkbox"/>                             |
| <input type="checkbox"/>                            |                | <input type="checkbox"/>                             |
| <input type="checkbox"/>                            |                | <input type="checkbox"/>                             |
| <input type="checkbox"/>                            |                | <input type="checkbox"/>                             |
| <input type="checkbox"/>                            |                | <input type="checkbox"/>                             |

**Patient 8**

Suppose this patient ([gender] with [severity\_1] plaques, [bsa\_1] BSA, and [joints\_1] affected joints) tells you [<he/she>] is experiencing the 5 symptoms in the list below. In your opinion, which of these symptoms is the most bothersome and least bothersome to this patient?

| <b>MOST<br/>bothersome<br/>(Check only<br/>ONE)</b> | <b>Symptom</b> | <b>LEAST<br/>bothersome<br/>(Check only<br/>ONE)</b> |
|-----------------------------------------------------|----------------|------------------------------------------------------|
| <input type="checkbox"/>                            |                | <input type="checkbox"/>                             |
| <input type="checkbox"/>                            |                | <input type="checkbox"/>                             |
| <input type="checkbox"/>                            |                | <input type="checkbox"/>                             |
| <input type="checkbox"/>                            |                | <input type="checkbox"/>                             |
| <input type="checkbox"/>                            |                | <input type="checkbox"/>                             |

In the following questions, we will ask you to think about 8 additional hypothetical patients.

Remember:

- Each of these patients is [gender].
- Each of these patients has plaques of [severity\_2] severity covering [bsa\_2] body surface area (BSA).
- Each of these patients has [joints\_2] painful, swollen, or tender joints.



**Patient 9**

Suppose this patient ([gender] with [severity\_2] plaques, [bsa\_2] BSA, and [joints\_2] affected joints) tells you [<he/she>] is experiencing the 5 symptoms in the list below. In your opinion, which of these symptoms is the most bothersome and least bothersome to this patient?

| <b>MOST<br/>bothersome<br/>(Check only<br/>ONE)</b> | <b>Symptom</b> | <b>LEAST<br/>bothersome<br/>(Check only<br/>ONE)</b> |
|-----------------------------------------------------|----------------|------------------------------------------------------|
| <input type="checkbox"/>                            |                | <input type="checkbox"/>                             |
| <input type="checkbox"/>                            |                | <input type="checkbox"/>                             |
| <input type="checkbox"/>                            |                | <input type="checkbox"/>                             |
| <input type="checkbox"/>                            |                | <input type="checkbox"/>                             |
| <input type="checkbox"/>                            |                | <input type="checkbox"/>                             |

**Patient 10**

Suppose this patient ([gender] with [severity\_2] plaques, [bsa\_2] BSA, and [joints\_2] affected joints) tells you [<he/she>] is experiencing the 5 symptoms in the list below. In your opinion, which of these symptoms is the most bothersome and least bothersome to this patient?

| <b>MOST<br/>bothersome<br/>(Check only<br/>ONE)</b> | <b>Symptom</b> | <b>LEAST<br/>bothersome<br/>(Check only<br/>ONE)</b> |
|-----------------------------------------------------|----------------|------------------------------------------------------|
| <input type="checkbox"/>                            |                | <input type="checkbox"/>                             |
| <input type="checkbox"/>                            |                | <input type="checkbox"/>                             |
| <input type="checkbox"/>                            |                | <input type="checkbox"/>                             |
| <input type="checkbox"/>                            |                | <input type="checkbox"/>                             |
| <input type="checkbox"/>                            |                | <input type="checkbox"/>                             |

**Patient 11**

Suppose this patient ([gender] with [severity\_2] plaques, [bsa\_2] BSA, and [joints\_2] affected joints) tells you [<he/she>] is experiencing the 5 symptoms in the list below. In your opinion, which of these symptoms is the most bothersome and least bothersome to this patient?

| <b>MOST<br/>bothersome<br/>(Check only<br/>ONE)</b> | <b>Symptom</b> | <b>LEAST<br/>bothersome<br/>(Check only<br/>ONE)</b> |
|-----------------------------------------------------|----------------|------------------------------------------------------|
| <input type="checkbox"/>                            |                | <input type="checkbox"/>                             |
| <input type="checkbox"/>                            |                | <input type="checkbox"/>                             |
| <input type="checkbox"/>                            |                | <input type="checkbox"/>                             |
| <input type="checkbox"/>                            |                | <input type="checkbox"/>                             |
| <input type="checkbox"/>                            |                | <input type="checkbox"/>                             |

**Patient 12**

Suppose this patient ([gender] with [severity\_2] plaques, [bsa\_2] BSA, and [joints\_2] affected joints) tells you [<he/she>] is experiencing the 5 symptoms in the list below. In your opinion, which of these symptoms is the most bothersome and least bothersome to this patient?

| <b>MOST<br/>bothersome<br/>(Check only<br/>ONE)</b> | <b>Symptom</b> | <b>LEAST<br/>bothersome<br/>(Check only<br/>ONE)</b> |
|-----------------------------------------------------|----------------|------------------------------------------------------|
| <input type="checkbox"/>                            |                | <input type="checkbox"/>                             |
| <input type="checkbox"/>                            |                | <input type="checkbox"/>                             |
| <input type="checkbox"/>                            |                | <input type="checkbox"/>                             |
| <input type="checkbox"/>                            |                | <input type="checkbox"/>                             |
| <input type="checkbox"/>                            |                | <input type="checkbox"/>                             |

**Patient 13**

Suppose this patient ([gender] with [severity\_2] plaques, [bsa\_2] BSA, and [joints\_2] affected joints) tells you [<he/she>] is experiencing the 5 symptoms in the list below. In your opinion, which of these symptoms is the most bothersome and least bothersome to this patient?

| <b>MOST<br/>bothersome<br/>(Check only<br/>ONE)</b> | <b>Symptom</b> | <b>LEAST<br/>bothersome<br/>(Check only<br/>ONE)</b> |
|-----------------------------------------------------|----------------|------------------------------------------------------|
| <input type="checkbox"/>                            |                | <input type="checkbox"/>                             |
| <input type="checkbox"/>                            |                | <input type="checkbox"/>                             |
| <input type="checkbox"/>                            |                | <input type="checkbox"/>                             |
| <input type="checkbox"/>                            |                | <input type="checkbox"/>                             |
| <input type="checkbox"/>                            |                | <input type="checkbox"/>                             |

**Patient 14**

Suppose this patient ([gender] with [severity\_2] plaques, [bsa\_2] BSA, and [joints\_2] affected joints) tells you [<he/she>] is experiencing the 5 symptoms in the list below. In your opinion, which of these symptoms is the most bothersome and least bothersome to this patient?

| <b>MOST<br/>bothersome<br/>(Check only<br/>ONE)</b> | <b>Symptom</b> | <b>LEAST<br/>bothersome<br/>(Check only<br/>ONE)</b> |
|-----------------------------------------------------|----------------|------------------------------------------------------|
| <input type="checkbox"/>                            |                | <input type="checkbox"/>                             |
| <input type="checkbox"/>                            |                | <input type="checkbox"/>                             |
| <input type="checkbox"/>                            |                | <input type="checkbox"/>                             |
| <input type="checkbox"/>                            |                | <input type="checkbox"/>                             |
| <input type="checkbox"/>                            |                | <input type="checkbox"/>                             |

**Patient 15**

Suppose this patient ([gender] with [severity\_2] plaques, [bsa\_2] BSA, and [joints\_2] affected joints) tells you [<he/she>] is experiencing the 5 symptoms in the list below. In your opinion, which of these symptoms is the most bothersome and least bothersome to this patient?

| <b>MOST<br/>bothersome<br/>(Check only<br/>ONE)</b> | <b>Symptom</b> | <b>LEAST<br/>bothersome<br/>(Check only<br/>ONE)</b> |
|-----------------------------------------------------|----------------|------------------------------------------------------|
| <input type="checkbox"/>                            |                | <input type="checkbox"/>                             |
| <input type="checkbox"/>                            |                | <input type="checkbox"/>                             |
| <input type="checkbox"/>                            |                | <input type="checkbox"/>                             |
| <input type="checkbox"/>                            |                | <input type="checkbox"/>                             |
| <input type="checkbox"/>                            |                | <input type="checkbox"/>                             |

**Patient 16**

Suppose this patient ([gender] with [severity\_2] plaques, [bsa\_2] BSA, and [joints\_2] affected joints) tells you [<he/she>] is experiencing the 5 symptoms in the list below. In your opinion, which of these symptoms is the most bothersome and least bothersome to this patient?

| <b>MOST<br/>bothersome<br/>(Check only<br/>ONE)</b> | <b>Symptom</b> | <b>LEAST<br/>bothersome<br/>(Check only<br/>ONE)</b> |
|-----------------------------------------------------|----------------|------------------------------------------------------|
| <input type="checkbox"/>                            |                | <input type="checkbox"/>                             |
| <input type="checkbox"/>                            |                | <input type="checkbox"/>                             |
| <input type="checkbox"/>                            |                | <input type="checkbox"/>                             |
| <input type="checkbox"/>                            |                | <input type="checkbox"/>                             |
| <input type="checkbox"/>                            |                | <input type="checkbox"/>                             |



## Other Questions About You

14. In what year were you born? \_\_\_\_\_

15. What is your gender?

Female

Male

Prefer not to answer

16. In which state or states are you licensed to practice?

\_\_\_\_\_
